# Supplementary material for: Meteorological ingredients of heavy precipitation and subsequent lake filling episodes in the northwestern Sahara
Source: Copernicus journal article supplement (doi:10.5194/egusphere-2024-539), 2024-04-03
Supplement: Supplementary file [file egusphere-2024-539-AC1-supplement.pdf]

Reviewer #1

### Overview:

The paper quantifies the meteorological and synoptic conditions during the filling of a lake in the northwestern Sahara using reanalysis data and satellite images. The paper describes the synoptic conditions leading to the lake filling and shows that cyclones and Sahara moisture recycling are important prerequisites for a lake filling event. They propose a shift in the understanding of the mid-Holocene green Sahara phenomenon, emphasizing the frequency and intensity of events rather than a large-scale northward shift of the rain belts.

I found the paper very interesting and innovative, and one that will have an important impact on the thinking of the greening of the Sahara. I think the paper is suitable for publication once a few minor, mostly structural and clarification comments, are addressed.

We would like to thank Reviewer #1 for the time taken to read our manuscript and for the constructive comments. We are also glad to see that we could convey the main messages of this manuscript in an understandable way and that they are acknowledged by the reviewer. Please see below our detailed response to all the comments raised by the reviewer.

### Minor comments:

I found the structure of the results somewhat confusing. The paper would benefit greatly, if there is a better separation between the observations and interpretations and a clearer explanation of what the main points of the figures are. For example, in fig 7, instead of “Overview of synoptic-scale conditions during HPE5.1” use “An example of the formation of a southward moving deep cyclone during an HPE event”. Or fig 5, instead of “Overview of..” use: “Duration, intensity and runoff coefficients of HPE and LFE events”. And perhaps add commentary to what the reader should understand from the caption “showing an agreement of intensity and duration between ERA5 and IMERG data” etc. This is true for all figure captions. Please help the reader understand what the main point of the figure is.

We thank the reviewer for pointing us to this confusing structure.

With regards to the figure captions, we will make the following changes (additions are in bold) to the figure captions:

Fig. 3: “... MNDWI thresholds 0.1, 0.25, 0.4, 0.55, and 0.7 are marked (grey lines). **The sensitivity of the area, and to a lesser extent, the volume to changes in MNDWI threshold is low over a wide range of MNDWI values...**”

Fig. 5: “~~Overview of HPEs and LFEs~~ **Duration and accumulated precipitation of HPEs, and runoff coefficients of LFEs...** medium HPEs are marked with dots. **Both data sources show relatively good agreement for precipitation accumulation, but ERA5 is negatively biased compared with IMERG. Additionally, LFEs are only observed over the ten largest HPEs by magnitude. (b)-Precipitation during LFE-generating HPEs compared with Effective runoff coefficient during LFEs computed by dividing the lake storage change with precipitation during LFE-generating HPEs.**”

Fig. 7: “~~Overview of synoptic-scale conditions during HPE5.1 (panels a and b), and HPE5.2 (panels c and d) as an example for the southward intrusion of upper-level PV-features and a low-level cyclone, and a northward intrusion of moist air...~~”

Fig. 8: **“Moisture dynamics during HPE5.1 and HPE5.2 (LFE5). The temporal evolution of the atmospheric column during HPE5.1 and HPE5.2 (LFE5) is interpolated to the catchment centre...”**

Additionally, we will add at the end of the caption **“Precipitation evaporation and sublimation are evident before each of the two rain periods.”**

Fig. 9: We will add at the end of the caption **“Moisture sources clearly differ between the two rain periods.”**

Fig. 10: We will add at the end of the caption **“Precipitation evaporation and sublimation are exhibited over two periods before the arrival of these air parcels into the catchment.”**

Fig. 11: We will add at the end of the caption **“Anomalies are clearly more emphasised during LFEs compared to HPEs and during strong HPEs compared to medium HPEs.”**

Furthermore, we would revise the structure of the manuscript such that all the parts dealing with the domino effect are concentrated near the end of the results section, as a “bridge” to the discussion.

In the results, evolution of HPE5 is given as an example for all HPE's. I think this is reasonable for the synoptic evolution. However, using the HPE5 as an example for the moisture sources isn't clear and the discussion about the proposed “domino effect” is misplaced. The discussion of the “domino effect” should be linked with fig 13, where it is clearest. In the way it is written, the mechanism is proposed before the full results are presented, which makes the claim weaker during the reading and stronger only after the full results are presented. I suggest moving section 4.2.2 to the discussion. In this way, you can lay out the full argument for the “domino effect” in one place, with all the key observations required to understand the mechanism already laid out.

We agree with the reviewer about the confusing aspect of the domino effect. Therefore, we have put all the observations that relates to it at the end of the results section, and we will further discuss it in the discussion.

Duration of the events seems to be the key component of the LFE, if the system persists for long enough there will be a LFE (Fig. 5a shows this clearly). This aspect of the system was not discussed much. What causes the system to persist for 5 days over 1 day?

We agree with the reviewer about the importance of the duration of events, and therefore added a short section in the discussion where we explain this: **“Persistence of upper-level conditions conducive to air lifting can happen, for example, when a strong, northward extending, blocking high is situated upwind in the central North Atlantic ocean.** An example of this is given by the November 2014 case study (Sect. 4.2) where PV structures appear repeatedly in the vicinity of the catchment **and a high persists over the central North Atlantic.** The persistent conditions allow for increased moisture transport, continuous formation of rain cells, and therefore also for a longer rainfall duration and areal coverage, which are needed to generate intense desert floods (e.g., Doswell et al., 1996; Morin and Yakir, 2014). These conditions lead to relatively long-duration HPEs, typically 3 d for the LFE-triggering HPEs.” (L563-569).

Runoff coefficient is a very important aspect of the LFE's (as explained by the authors). However, it is unclear what generates the large Runoff coefficients. It would be beneficial to discuss this, even if there isn't a concrete answer to this problem.

We thank the reviewer for this suggestion and agree that this is indeed an important question. To answer it, we added a short description of what we suggest that could have been important in generating high runoff coefficient values. **“The higher runoff coefficient values are**

presumably related to precipitation over the parts of the catchment where rocky surface are exposed in combination with higher rainfall intensities, as well as longer rainfall durations and shorter inter-event periods. All these aspects increase the runoff contributing area and its contribution to flood discharge (e.g., Rinat et al., 2021).” (L599-602).

**Line comments:**

L11. Should be: eventuated  
Corrected.

L116. Should be: spelled  
Corrected.

L116. Add coordinates  
Added.

Figure 1. Add location of cities for orientation: Bechar, Kerzaz, El Menia, etc.  
Added.

Figure 1b. From the decrepitation and figure the properties of the lake are unclear. There is no need for the inset on the left, it is redundant with fig. 1a. Would be better to remove it and add a bigger image of the sebkha itself, and perhaps an image showing a time the lake was dry/drier, and a topographic transect showing the water level.

The figure is now revised (see below). We have removed the zoomed-out satellite map and added a cross section of the lake’s bathymetry. We decided not to put a figure showing the empty lake, as it is barely visible in such an image.

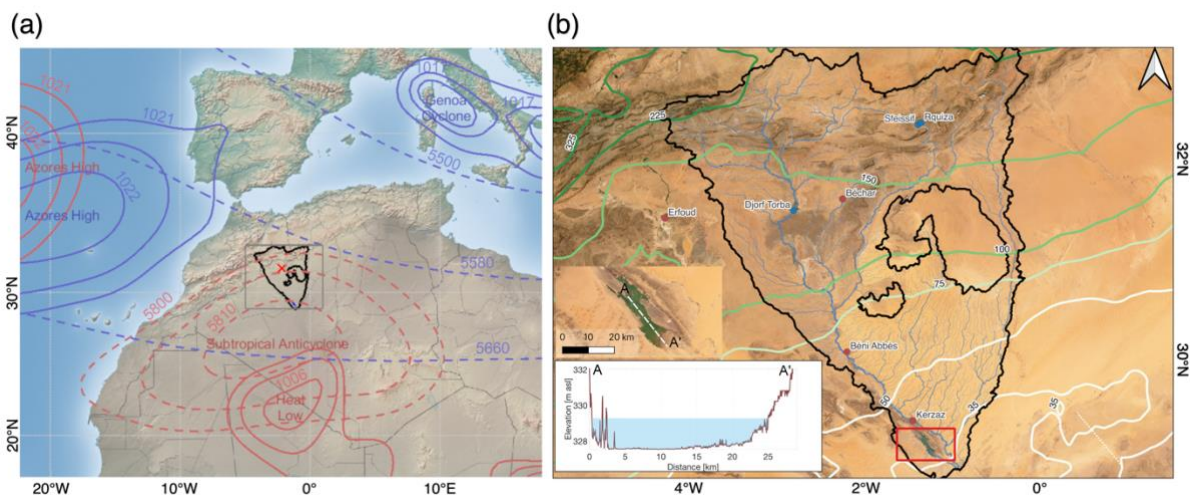

L123. How deep does the water get? How deep does the water need to be for the lake to overflow?

The water gets to a bit less than 5 m when the lake is overflow. We have added this information to the text: “When the lake reaches full capacity, **~5 m depth and ~0.9 km<sup>3</sup>** (Fig. 1b and Fig. A2), which only happens in extremely rare floods...”

L126. How do you know what the geology is? You didn't cite a geological map.

We have now added a reference to a book chapter describing the geology of the region (Merzougui et al., 2017).

**L128. Please add the location of these dams to figure 1, otherwise, these location names are meaningless. Do you take these dams into account when calculating the size of the catchment?**

We have now added indications for the dams' locations on top of the location map (Fig. 1b). We do not take these dams into account for the size of the catchment, as water still flows downstream of the dams. The outflow of the Djorf Torba (the main dam) is reported in Sarra et al. (2023), however the raw data is unavailable to us, although we sent data requests to both the corresponding author of this paper and to the chief editor of the journal. Our observations, as well as satellite observations from September 2024 (not shown in the paper) suggest that the lake is still fed by large floods in the wadi, even after dams were constructed. We expect small events to be affected by the presence of the dams, however, as noted in the manuscript "... large HPEs are not expected to be heavily affected; the main dam in the catchment can only contain  $\sim 0.25 \text{ km}^3$  (Sarra et al., 2023), which is  $\sim 4 \%$  of the mean catchment rainfall in the largest HPE (Fig. 5a)".

**L147. Should be e.g., precipitation and evaporation? Evaporation of precipitation?**

The latter is what we meant. Therefore, we rephrased into "evaporation of precipitation".

**L215. Why not use model estimates of evaporation? e.g., the method used by: Zhou et al., NC (<https://doi.org/10.1038/s41467-022-31125-6>).**

We appreciate the reviewer suggestion of directly calculating evaporation from the lake, which may result in more precise evaporation estimates during the times when the lake was full. However, we want to stress that we have addressed rough evaporation estimates mainly as a way to calculate potential errors to our method, as displayed in Fig. 5b. As this figure shows, major changes in the method used to estimate the evaporation rate can only affect the smallest LFEs (#4 and #6), while the effect over all other events would probably be negligible. Moreover, the paper by Zhou takes a global perspective, and therefore, unique properties of specific lakes are to some extent concealed by the large number of lakes. If we would like to use their model to directly calculate evaporation over the lake, we would need to assess a few more parameters which are not known to us. These include the water salinity (or activity), water temperature, the function coefficients a and b that depends on the local topography, stability conditions etc. When taking assumptions on these parameters we would introduce new errors in assessing the evaporation from the lake, and we believe the resulting values would not drastically differ from our current estimate of 20 cm per month, since the primary controls (air temperature, atmospheric saturation deficit, and wind) for evaporation are taken into account when giving this estimate.

**L263. Where does the actual dq data come from? AR5? IMERG?**

It is from ERA5. We will add this information to the text.

**L320. 100 mm where? In how much time?**

To make this clearer, we would rephrase into: "where average precipitation over the catchment reaches nearly 100 mm during the event duration".

**L364. Should be: predominantly**

Corrected.

**L375. It's not clear to me why you invoke this domino mechanism. If there is subsidence which prevents uplifting of the moisture, can't the moisture be caught in mid-levels and be pushed eastwards, which wouldn't require precipitation and evaporation? and the long residence time is because the moisture never reaches condensation levels?**

As the reviewer suggests, subsidence can indeed cause moisture to be caught in mid-levels which would only trigger precipitation later, when this moisture is being uplifted, as suggested, e.g., by Rubin et al., 2007. However, if that would have been the case, the Sahara would not have been classified as a moisture source by the moisture source diagnostic (MSD).

Clearly long residence times of water vapour in the atmosphere also play a role in precipitation events in the Sahara (climatologically 6-10 days, see for example, Sodemann 2020). However, at this line in the text we discuss the results shown in Fig. 9c. These results were compiled based on the trajectory-based MSD that we present in the methods (Section 3.2.5). For this method to diagnose moisture uptake a physical process has to inject moisture into an air parcel. This can happen in different ways, e.g., through surface evaporation, turbulent mixing, as well as precipitation evaporation. At L. 375 we write that given the large share of uptakes happening in the Sahara, where surface evaporation is small or zero, another process is responsible. Given our results in Fig. 10 showing the trajectories arriving in the catchment during the first precipitation peak of LFE5 (HPE5.1) gaining humidity as they pass below a large-scale upper-level cloud system (see Fig. 10 and A5) we hypothesise that this is likely due to precipitation recycling. The fact that this water vapour is not lost to the surface but largely evaporated below the cloud is indeed relevant for precipitation formation further downstream in the catchment. The domino effect we propose is a mechanism of hand over of moisture between different atmospheric layers transporting air of different origin. We suggest that this mechanism is likely relevant for the transport of moisture deeper into the Sahara, which is only made possible through recycling of moisture from mid-level or upper-level cloud systems. We understand that in the current formulation this was not made clear enough. We will clarify this as follows (in bold we show new text):

“A large part of this precipitation evaporates or sublimates when falling into the relatively dry lower troposphere (possibly forming virgae). **Thereby a vertical connection between the upper-level clouds transporting moisture of tropical origin and the lower level dry airstream from the Sahel is established.** This moisture thus gets recycled and transported further north into the catchment in a domino-like process, which may repeat itself several times on the transport pathway from the tropics into the Sahara and finally into the catchment. **This recycling process likely contributes in destabilising the lower to mid troposphere, which together with the large-scale convergence** ~~This process may be reinforced by the convergence~~ of moisture from different tropical sources (tropical North Atlantic and from the Sahel, Fig. 8; similar observations were made by Knippertz et al., 2003) **and the forcing for ascent due to topography upon arrival in the catchment leads to the formation of a large-scale deep convective system forming intense precipitation.**”

**It is also not clear why this is a prerequisite for the HPE event? If the source of the moisture is in the Atlantic and all that is happening is recycling within the troposphere, why do you suddenly get a downpour? I think the mechanism and its link to the HPE needs to be explained more clearly.**

We have now revised the description of the domino effect, as reflected in our previous answers. However, it must be noted that the discussion about the moisture sources and the one about the triggering mechanism are two separate issues. We have added a short description of the need in such a mechanism at the beginning of the text dealing with it “...given the normally dry conditions over the surface of the Sahara, we can assume that mechanisms other than surface evaporation are involved in triggering such HPEs. Based on the evaporation of precipitation upwind (Fig. 10) and before the HPE starts (Fig. 8), we suggest that a pre-moistening of the atmosphere in the vicinity of the catchment is important for precipitation formation over Sebkh el Melah, and that recycling of moisture in a domino-like way throughout the upstream region within the Sahara is significant for HPEs. We term this moisture recycling mechanism “domino effect”.”

With regards to Atlantic moisture, as seen in our climatology of moisture sources, it seems to play a major role, but not as big as Saharan moisture. In normal conditions, we assume that moisture from the Atlantic goes up the Atlas Mountains and is precipitated along the range. When it reaches the southeastern side of the range, a substantial portion of the moisture is already dried up because of the upwind rains, and therefore, only a small part is left for precipitation in the Sahara.



A downpour would occur only if enough moisture was transported into the region and is then combined with a strong enough lifting mechanism, as we describe in our discussion section.

**L384 – 389 and Figure 8. At what height are you measuring RH? It is interesting the RH increases only when rainfall reaches the ground 22/11 at 3:00. If there is recycling of moisture before this, shouldn't RH go up already during the enhanced moisture input?**

We thank the reviewer for pointing this missing information to us. The RH shown is at the surface (we will add the word “surface” into the caption), and therefore, heavily depends on rainfall but not on recycling of moisture further up in the atmosphere nor recycling of moisture further upstream along the transport pathway, as discussed in the domino effect.

**Figure 10. What are the units of the x axis in a and b? If this is time, it should be noted in the figure or caption. Also, I'm not sure how this figure helps with depicting the domino effect (from lines 390-393).**

It is indeed time (in h). We would add this information into the figure caption. With regards to the domino effect, we have revised the text describing it (see above). More specifically, this figure shows the location of the trajectories, which arrive in the layer producing precipitation that reaches the surface of the catchment at 6UTC on 23.11. In this figure we see the history of these air parcels forward in time. The vertical location of the air parcels during their 3D voyage through the atmosphere is shown in Fig. 10d geographical location of the air parcels in Fig. 10c. What we see in Fig. 10b is the vertical structure of the clouds and the content of specific humidity throughout the troposphere when we “sit” on the air parcels and look up and downwards to the surface. So, Fig. 10a,b show us vertical profiles at each geographical location of the air parcels of panel c. For each hourly time step between 13.11 and 23.11 we see a composite of the conditions along the vertical profiles at the location of the air parcels. It therefore gives us a mean atmospheric column along the airstream (consisting of the different air parcels that produce precipitation). This airstream is relatively consistent in its transport history, which is a prerequisite for performing such an analysis. We see the domino effect at play starting from about 72h before arrival until arrival in the catchment with the snow falling between 700 hPa and 400 hPa (pink contours in panel b, note the snow gets sublimated before reaching the melting level) and the increase in specific humidity first at about 500 hPa and then later on in the whole lower troposphere (panel a) as rain starts to form (blue contours panel b, note that the rain is not reaching the surface until arrival in the catchment).

**Figure 13. This figure is essential to your arguments of the “domino effect”, I think it should be presented earlier in the text. Is this based on the MSD analysis? Please explain how this data is constructed.**

We have restructured the domino effect text. Fig. 13 is indeed tied to the MSD analysis. Therefore, we have added this information to the figure caption. Furthermore, we changed the text as follows: “To investigate the importance of the domino process in more detail we compiled a composite of the moisture sources of all medium HPEs, strong HPEs, and LFE-generating HPEs using our trajectory-based MSD results. Thereby we can show that the importance of moisture recycling through this domino process is likely considerable and intensifies with increased event magnitude. The origin of more than 60% of the moisture throughout all HPEs is classified as coming from the desert (Fig. 13: orange-yellow colours). While the largest moisture-contributing region to HPEs is the Sahara and the vicinity of the Sebkh el Melah catchment, during LFE-generating HPEs the role of the farther Sahara and even the Sahel is clearly more important than for strong and medium HPEs. During these non-lake-filling HPEs, the moisture originates from regions closer to the catchment and higher contributions from the Atlantic and the Mediterranean are observed.”

We seriously thought about the suggestion of restructuring our order of results, but we don't agree that Fig. 13 would be better placed earlier in the manuscript. It is a composite over all events showing differences for different categories of extreme precipitation events and

therefore it seems more natural to us to first explain the mechanistic details of the domino process based on Figs. 9 and 10 and taking LFE5 as an illustrative example, and then summarize the results from all precipitation events to highlight the climatological importance of the suggested mechanism.

**L482. What part of the tropics? How is this moisture getting to the catchment? How does it relate with the moisture coming in from the Atlantic? This statement seems to be new and requires a bit more clarification.**

This description is related to the domino effect and was therefore revised. Moisture from equatorial Africa seems to precede the Atlantic moisture, however, it is being recycled along its way. In the second stage of the event (HPE #5.2) moisture from the Atlantic plays a more significant role (Fig. 9b). Our strategy is to explain the mechanism behind the domino effect early in the results section because it is an important aspect of effective moisture transport into the Sahara. Here we go one step further than in the case study of LFE 5 and generalise the importance of remote moisture and its recycling underways for producing large amounts of precipitation that are required for filling the Sebkh el Melah lake. Based on the MSD method we can unfortunately not say from which parts of the tropics the recycled moisture originally comes from. For this we would need numerical tracers such as we used in Dahinden et al. 2023 ASL or water isotope observations. This goes beyond the scope of this article but we will add a sentence mentioning this:

“However, to generate enough precipitation to fill the lake, moisture recycled from farther away is necessary, brought from the tropics and recycled over the Sahel and the Sahara. With the MSD approach used in this study it is not possible to identify the sources of the recycled moisture underway, however in a future study we plan to use a regional climate model with numerical tracers (as in Dahinden et al. 2023, which will allow to identify the tropical regions from which the moisture from the mid to upper-level cloud layers originate.”

**L608 – 614. I think the emphasis here is not precise. If during the mid-Holocene the lakes are higher, or more persistent, there are more LFE's and most likely an increase in the multiyear rainfall mean. So, the distinction you are making is not about the mean rainfall but about the type of system that causes the LFE. I think what you would like to say and are not saying clearly enough, is that given the modern conditions, a large scale northward shift of the African monsoon during the mid Holocene is not necessary. Rather, a higher tendency of westward cyclones could produce the same paleo archive. The question you should be raising is: given that models find it hard to move the monsoon this far north under the moderate forcing of the mid-Holocene, is it easier to produce more frequent cyclones under these conditions? If so, this would reduce the mismatch between paleo data and models.**

We appreciate the reviewer's suggestion about the focus of this discussion part, and have therefore, added this suggestion to the discussion and mentioned it in the conclusions and abstract. We do, however, still think that the hypothesis we previously suggested is relevant and we have tried to make the text about it clearer in the revised version. A tendency towards more extreme weather events, with no change of the mean annual precipitation, would trigger a higher chance of getting the lake to be filled. When combined with the fact that the lake takes a few years to empty out, we think that this type of climate change can sustain generally higher lake levels in the Sahara.

## References

Dahinden, F., Aemisegger, F., Wernli, H., and Pfahl, S.: Unravelling the transport of moisture into the Saharan Air Layer using passive tracers and isotopes, *Atmos. Sci. Lett.*, 24, 1–11, <https://doi.org/10.1002/asl.1187>, 2023.

Merzougui, T., Mekkaoui, A., Mansour, H., and Graine-tazrout, K.: Hydrogeology of Béni Abbès: potential, hydrodynamics and influence on the palm field (Valley of Saoura, Algerian South-West), in: *Aquifer Systems Management: Darcy's Legacy in a World of Impending Water Shortage*, edited by: Chery, L. and de Marsily, G., Taylor & Francis, 269–278, 2007.

Sodemann, H.: Beyond turnover time: Constraining the lifetime distribution of water vapor from simple and complex approaches, *J. Atmos. Sci.*, 77, 413–433, <https://doi.org/10.1175/JAS-D-18-0336.1>, 2020.
